# Supplementary material for: Development, Optimization, and Validation of Forensic Analytical Method for Quantification of Anticholinesterase Pesticides in Biological Matrices from Suspected Cases of Animal Poisoning
Source: MDPI journal article supplement (doi:10.3390/toxics10050269), 2022-05-23
Supplement: s1 [file s1]

# Supplementary Materials: Development, Optimization, and Validation of Forensic Analytical Method for Quantification of Anticholinesterase Pesticides in Biological Matrices from Suspected Cases of Animal Poisoning

André R. Fukushima, Juliana Weckx Peña-Muñoz, Luís A. B. Leoni, Maria A. Nicoletti, Glaucio M. Ferreira, Jan C. O. B. Delorenzi, Esther L. Ricci, Marlos E. Brandão, Lorena P. Pantaleon, Vagner Gonçalves-Junior, Paula Andrea Faria Waziry, Paulo C. Maiorka and Helenice S. Spinosa

**Table S1.** Mean of the line equations, correlation coefficient ( $r^2$ ) and variant coefficient of the calibration curves for aldicarb for the analyzed matrices.

| Matrices         | Mean Line Equation     | $r^2$ Medium | Coefficient of Variation |
|------------------|------------------------|--------------|--------------------------|
| Standard         | $y = 0.0011x - 0.0022$ | 0.99         | 0.12%                    |
| Blood            | $y = 0.0011x - 0.0047$ | 0.99         | 4.66%                    |
| Stomach contents | $y = 0.0011x + 0.0107$ | 0.99         | 5.18%                    |
| Brain            | $y = 0.0011x + 0.0056$ | 0.99         | 4.70%                    |
| Heart            | $y = 0.001x + 0.0074$  | 0.99         | 19.68%                   |
| Liver            | $y = 0.0014x - 0.0403$ | 0.99         | 7.28%                    |
| Vitreous humor   | $y = 0.0012x + 0.0142$ | 0.99         | 5.08%                    |
| Lung             | $y = 0.0011x + 0.0241$ | 0.99         | 4.57%                    |
| Kidneys          | $y = 0.0012x + 0.013$  | 0.99         | 5.99%                    |

**Table S2.** Mean of the line equations, correlation coefficient ( $r^2$ ) and variant coefficient of the calibration curves for aldicarb-sulphoxide for the analyzed matrices.

| Matrices         | Mean Line Equation                 | $r^2$ Medium | Coefficient of Variation |
|------------------|------------------------------------|--------------|--------------------------|
| Standard         | $y = 0.0002x - 0.0012$             | 0.99         | 0.12%                    |
| Blood            | $y = 0.0002x - 0.0015$             | 0.99         | 3.65%                    |
| Stomach contents | $y = 0.0002x + 0.0119$             | 0.99         | 2.16%                    |
| Brain            | $y = 1 \times 10^{-0.4}x + 0.0144$ | 0.99         | 5.73%                    |
| Heart            | $y = 0.0002x - 0.0097$             | 0.99         | 18.38%                   |
| Liver            | $y = 9 \times 10^{-0.6}x + 0.0034$ | 0.99         | 4.26%                    |
| Vitreous humor   | $y = 3 \times 10^{-0.5}x + 0.0008$ | 0.99         | 2.18%                    |
| Lung             | $y = 0.0011x + 0.0241$             | 0.99         | 4.57%                    |
| Kidneys          | $y = 4 \times 10^{-0.5}x + 0.0023$ | 0.99         | 4.99%                    |

**Table S3.** Mean of the line equations, correlation coefficient ( $r^2$ ) and variant coefficient of the calibration curves for aldicarb-sulphone for the matrices studied.

| Matrices         | Mean line equation                             | $r^2$ medium | Coefficient of variation |
|------------------|------------------------------------------------|--------------|--------------------------|
| Standard         | $y = 0.0016x + 0.0449$                         | 0.99         | 0.15%                    |
| Blood            | $y = 0.0017x + 0.0549$                         | 0.99         | 4.67%                    |
| Stomach contents | $y = 7 \times 10^{-0.6}x + 0.0002$             | 0.99         | 4.15%                    |
| Brain            | $y = 1 \times 10^{-0.5}x + 0.0005$             | 0.99         | 3.72%                    |
| Heart            | $y = 7 \times 10^{-0.5}x + 0.0085$             | 0.99         | 16.98%                   |
| Liver            | $y = 6 \times 10^{-0.6}x + 4 \times 10^{-0.5}$ | 0.99         | 6.48%                    |
| Vitreous humor   | $y = 5 \times 10^{-0.6}x - 0.0001$             | 0.99         | 1.08%                    |
| Lung             | $y = 5 \times 10^{-0.6}x + 0.0002$             | 0.99         | 3.27%                    |

|         |                                    |      |       |
|---------|------------------------------------|------|-------|
| Kidneys | $y = 1 \times 10^{-0.5}x + 0.0006$ | 0.99 | 2.43% |
|---------|------------------------------------|------|-------|

**Table S4.** Mean of the line equations, correlation coefficient ( $r^2$ ) and variant coefficient of the calibration curves for carbofuran for the matrices studied.

| Matrices         | Mean Line Equation     | $r^2$ Medium | Coefficient of Variation |
|------------------|------------------------|--------------|--------------------------|
| Standard         | $y = 0.0005x - 0.0077$ | 0.99         | 0.15%                    |
| Blood            | $y = 0.0004x - 0.0064$ | 0.99         | 2.53%                    |
| Stomach contents | $y = 0.0004x + 0.0037$ | 0.99         | 2.07%                    |
| Brain            | $y = 0.0004x - 0.0025$ | 0.99         | 3.18%                    |
| Heart            | $y = 0.0003x + 0.0081$ | 0.99         | 2.81%                    |
| Liver            | $y = 0.0003x - 0.0069$ | 0.99         | 1.50%                    |
| Vitreous humor   | $y = 0.0003x + 0.0002$ | 0.99         | 1.22%                    |
| Lung             | $y = 0.0011x + 0.0241$ | 0.99         | 4.57%                    |
| Kidneys          | $y = 0.0012x + 0.013$  | 0.99         | 5.99%                    |

**Table S5.** Mean of the line equations, correlation coefficient ( $r^2$ ) and variant coefficient of the calibration curves for 3-OH-Carbofuran for the matrices studied.

| Matrices         | Mean Line Equation     | $r^2$ Medium | Coefficient of Variation |
|------------------|------------------------|--------------|--------------------------|
| Standard         | $y = 0.0003x - 0.0007$ | 0.99         | 0.20%                    |
| Blood            | $y = 0.0003x - 0.0011$ | 0.99         | 2.65%                    |
| Stomach contents | $y = 0.0003x + 0.0013$ | 0.99         | 2.53%                    |
| Brain            | $y = 0.0003x + 0.0023$ | 0.99         | 4.10%                    |
| Heart            | $y = 0.0002x + 0.0064$ | 0.99         | 2.03%                    |
| Liver            | $y = 0.0002x + 0.0053$ | 0.99         | 3.35%                    |
| Vitreous humor   | $y = 0.0002x + 0.0074$ | 0.99         | 1.92%                    |
| Lung             | $y = 0.0002x + 0.0093$ | 0.99         | 8.68%                    |
| Kidneys          | $y = 0.0002x + 0.0078$ | 0.99         | 10.42%                   |

**Table S6.** Mean of the line equations, correlation coefficient ( $r^2$ ) and variant coefficient of the calibration curves for 3-OH-Carbofuran for the matrices studied.

| Matrices         | Mean Line Equation     | $r^2$ Medium | Coefficient of Variation |
|------------------|------------------------|--------------|--------------------------|
| Standard         | $y = 0.0003x - 0.0007$ | 0.99         | 0.20%                    |
| Blood            | $y = 0.0003x - 0.0011$ | 0.99         | 2.65%                    |
| Stomach contents | $y = 0.0003x + 0.0013$ | 0.99         | 2.53%                    |
| Brain            | $y = 0.0003x + 0.0023$ | 0.99         | 4.10%                    |
| Heart            | $y = 0.0002x + 0.0064$ | 0.99         | 2.03%                    |
| Liver            | $y = 0.0002x + 0.0053$ | 0.99         | 3.35%                    |
| Vitreous humor   | $y = 0.0002x + 0.0074$ | 0.99         | 1.92%                    |
| Lung             | $y = 0.0002x + 0.0093$ | 0.99         | 8.68%                    |
| Kidneys          | $y = 0.0002x + 0.0078$ | 0.99         | 10.42%                   |

Filename: toxics-1675017-SM.docx  
Directory: E:\5.23\metals-1712071  
Template: C:\Users\MDPI\Desktop\Toxics\materials\toxics-template.dot  
Title: Type of the Paper (Article  
Subject:  
Author: MDPI  
Keywords:  
Comments:  
Creation Date: 8/24/2021 2:59:00 PM  
Change Number: 9  
Last Saved On: 5/23/2022 5:34:00 PM  
Last Saved By: MDPI  
Total Editing Time: 20 Minutes  
Last Printed On: 5/23/2022 5:34:00 PM  
As of Last Complete Printing  
Number of Pages: 2  
Number of Words: 724  
Number of Characters: 3,363
